# Supplementary material
Source: ML conference proceedings conference paper supplement (https://openreview.net/forum?id=HeEzgm-f4g1)
Supplement: supplementary_material [file attachment]

## A BATCH SIZE ANALYSIS

In this section, we prove Lemma 4.1 and Corollary 4.2. We first present the following simplifying assumption that states that for any two vertices  $v_1, v_2$  the intersection of their neighborhoods has weak correlation.

**Assumption A.1** *Let  $S \subset V$  be a random set drawn such that each  $v \in V$  is picked to  $S$  with probability  $p > \log n/d_{\min}$ . There exist constants  $c_1, c_2 \in \mathbb{R}$  such that*

$$\frac{1}{c_1} \mathbf{E}_S[|N(v_1) \cap S|] \mathbf{E}_S[|N(v_2) \cap S|] \leq \mathbf{E}_S[|N(v_1) \cap S| \cdot |N(v_2) \cap S|] \leq c_2 \cdot \mathbf{E}_S[|N(v_1) \cap S|] \mathbf{E}_S[|N(v_2) \cap S|].$$

We start by stating a straightforward lemma from probability theory, whose proof is a direct application of Chernoff bounds.

**Lemma A.1** *Let  $U$  be a finite set, and consider a random set  $S \subseteq U$  drawn such that each element in  $U$  is picked to  $S$  with probability  $p$  independently. Then, with probability at least  $1 - o(1/\text{poly}(n))$*

$$|S| \in \left[ p|U| - \sqrt{p|U| \log n}, p|U| + \sqrt{p|U| \log n} \right]$$

For a fixed vertex  $u$ , we let  $\tilde{x}_u = Wx_u$ , so that our estimator

$$\xi = \frac{1}{|S_1|} \sum_{v \in S_1} \frac{\mathbf{1}_{N(v) \cap S_2 \neq \emptyset}}{|S_2 \cap N(v)|} \sum_{u \in N(v) \cap S_2} \frac{\tilde{A}_{v,u} \cdot \tilde{x}_u}{\alpha_v}$$

We start with the proof of Proposition 4.1. Note that we considered the more general case where  $S_1$  is picked according to probability  $p = m_1/n$  and  $S_2$  is picked according to probability  $q = m_2/n$ .

**Proof of Proposition 4.1:** We start with computing the mean of our estimator.

$$\begin{aligned} \mathbf{E}_{S_1, S_2} \left[ \frac{1}{|S_1|} \sum_{v \in S_1} \chi_v \right] &= \mathbf{E}_{S_1, S_2} \left[ \frac{1}{|S_1|} \sum_{v \in S_1} \frac{\mathbf{1}_{N(v) \cap S_2 \neq \emptyset}}{\alpha_v \cdot |N(v) \cap S_2|} \sum_{u \in N(v) \cap S_2} \tilde{A}_{v,u} \tilde{x}_u \right] \\ &= \mathbf{E}_{S_1, S_2} \left[ \frac{1}{|S_1|} \sum_{v, u \in V} \mathbf{1}_{v \in S_1} \cdot \mathbf{1}_{N(v) \cap S_2 \neq \emptyset} \cdot \mathbf{1}_{u \in S_2 \cap N(v)} \cdot \frac{\tilde{A}_{v,u} \tilde{x}_u}{\alpha_v \cdot |S_2 \cap N(v)|} \right] \\ &= \sum_{(v,u) \in E} \mathbf{E}_{S_1, S_2} \left[ \frac{\mathbf{1}_{v \in S_1}}{|S_1|} \frac{\mathbf{1}_{N(v) \cap S_2 \neq \emptyset} \mathbf{1}_{u \in S_2}}{\alpha_v \cdot |N(v) \cap S_2|} \right] \cdot \tilde{A}_{v,u} \tilde{x}_u, \end{aligned}$$

where for an event  $Z$  we let  $\mathbf{1}_Z$  denote the indicator random variable for  $Z$ .

Note that by the fact that each vertex is picked to  $S_1$  (respectively  $S_2$ ) independently w.p  $p$  we can apply Lemma A.1 and conclude that with very high probability  $|S_1| = pn \pm \sqrt{pn \log n} = \Theta(pn)$

By the independence of  $S_1$  and  $S_2$ , and an application of Jensen's inequality, we can establish the following bound:

$$\mathbf{E}_{S_1, S_2} \left[ \frac{\mathbf{1}_{v \in S_1}}{|S_1|} \frac{\mathbf{1}_{u \in S_2}}{\alpha_v |N(v) \cap S_2|} \right] = \mathbf{E}_{S_1} \left[ \frac{\mathbf{1}_{v \in S_1}}{|S_1|} \right] \mathbf{E}_{S_2} \left[ \frac{\mathbf{1}_{N(v) \cap S_2 \neq \emptyset} \mathbf{1}_{u \in S_2}}{\alpha_v |N(v) \cap S_2|} \right] \geq \Omega \left( \frac{\alpha_v}{n \alpha_v |N(v)|} \right) = \Omega \left( \frac{1}{n |N(v)|} \right),$$

where we used the fact that,  $\Pr[\mathbf{1}_{N(v) \cap S_2 \neq \emptyset}] = \alpha_v$ , leading to mean of  $\Omega \left( \frac{1}{n} \sum_{(v,u) \in E} \frac{\tilde{A}_{v,u} \tilde{x}_u}{|N(v)|} \right)$ .

Next, we compute the second moment of our estimator.

$$\begin{aligned}
& \mathbf{E}_{S_1, S_2} \left[ \frac{1}{|S_1|^2} \sum_{v_1, v_2 \in S_1} \chi_{v_1} \chi_{v_2} \right] \\
&= \mathbf{E}_{S_1, S_2} \left[ \frac{1}{|S_1|^2} \sum_{(v_1, u_1), (v_2, u_2) \in E} \frac{\mathbf{1}_{v_1, v_2 \in S_1} \cdot \mathbf{1}_{u_1, u_2 \in S_2} \cdot \mathbf{1}_{N(v_1) \cap S_2 \neq \emptyset} \mathbf{1}_{N(v_2) \cap S_2 \neq \emptyset}}{\alpha_{v_1} |N(v_1) \cap S_2| \alpha_{v_2} |N(v_2) \cap S_2|} \tilde{A}_{v_1, u_1} \tilde{x}_{u_1} \tilde{A}_{v_2, u_2} \tilde{x}_{u_2} \right] \\
&= \sum_{(v_1, u_1), (v_2, u_2) \in E} \mathbf{E}_{S_1, S_2} \left[ \frac{\mathbf{1}_{v_1, v_2 \in S_1} \cdot \mathbf{1}_{u_1, u_2 \in S_2} \mathbf{1}_{N(v_1) \cap S_2 \neq \emptyset} \mathbf{1}_{N(v_2) \cap S_2 \neq \emptyset}}{|S_1|^2 \cdot \alpha_{v_1} \alpha_{v_2} |N(v_1) \cap S_2| |N(v_2) \cap S_2|} \right] \cdot \tilde{A}_{v_1, u_1} \tilde{x}_{u_1} \tilde{A}_{v_2, u_2} \tilde{x}_{u_2}.
\end{aligned}$$

Similarly to before, we inspect the above expectation. In here, there are four cases corresponding to the following sets.

1.  $\mathcal{C}_1 = \{(v_1, u_1), (v_2, u_2) \in E \mid v_1 \neq v_2, u_1 \neq u_2\}$ : in a similar way to before, by Lemma A.1, we obtain

$$\begin{aligned}
& \mathbf{E}_{S_1, S_2} \left[ \frac{\mathbf{1}_{v_1, v_2 \in S_1} \cdot \mathbf{1}_{u_1, u_2 \in S_2} \mathbf{1}_{N(v_1) \cap S_2 \neq \emptyset} \mathbf{1}_{N(v_2) \cap S_2 \neq \emptyset}}{|S_1|^2 \cdot \alpha_{v_1} \alpha_{v_2} |N(v_1) \cap S_2| |N(v_2) \cap S_2|} \right] \\
&= \frac{p^2}{\alpha_{v_1} \alpha_{v_2} (pn)^2} \mathbf{E}_{S_2} \left[ \frac{\mathbf{1}_{N(v_1) \cap S_2 \neq \emptyset} \mathbf{1}_{N(v_2) \cap S_2 \neq \emptyset} \mathbf{1}_{u_1, u_2 \in S_2}}{|N(v_1) \cap S_2| |N(v_2) \cap S_2|} \right] \\
&= \frac{p^2 q^2}{(pn)^2} \mathbf{E}_{S_2} \left[ \frac{1}{|N(v_1) \cap S_2| |N(v_2) \cap S_2|} \right],
\end{aligned}$$

where we used the fact that for  $v_i$ ,  $\Pr[\mathbf{1}_{N(v_i) \cap S_2 \neq \emptyset}] = \alpha_{v_i}$ .

In order to analyze the above expectation, we use our assumption that neighborhoods are uncorrelated to get

$$\mathbf{E}_{S_1, S_2} \left[ \frac{\mathbf{1}_{v_1, v_2 \in S_1} \cdot \mathbf{1}_{u_1, u_2 \in S_2} \mathbf{1}_{N(v_1) \cap S_2 \neq \emptyset} \mathbf{1}_{N(v_2) \cap S_2 \neq \emptyset}}{|S_1|^2 \cdot \alpha_{v_1} \alpha_{v_2} |N(v_1) \cap S_2| |N(v_2) \cap S_2|} \right] \lesssim \frac{1}{n^2 |N(v_1)| \cdot |N(v_2)|}.$$

2.  $\mathcal{C}_2 = \{(v_1, u_1), (v_2, u_2) \in E \mid v_1 \neq v_2, u_1 = u_2\}$ : similarly to the previous case,

$$\mathbf{E}_{S_1, S_2} \left[ \frac{\mathbf{1}_{v_1, v_2 \in S_1} \cdot \mathbf{1}_{u_1, u_2 \in S_2} \mathbf{1}_{N(v_1) \cap S_2 \neq \emptyset} \mathbf{1}_{N(v_2) \cap S_2 \neq \emptyset}}{|S_1|^2 \cdot \alpha_{v_1} \alpha_{v_2} |N(v_1) \cap S_2| |N(v_2) \cap S_2|} \right] \lesssim \frac{1}{qn^2 |N(v_1)| |N(v_2)|}.$$

3.  $\mathcal{C}_3 = \{(v_1, u_1), (v_2, u_2) \in E \mid v_1 = v_2, u_1 \neq u_2\}$ . This case requires extra care, since in this case, the neighborhoods of  $v_1$  and  $v_2$  are correlated (actually the same).

$$\mathbf{E}_{S_1, S_2} \left[ \frac{\mathbf{1}_{v_1, v_2 \in S_1} \cdot \mathbf{1}_{u_1, u_2 \in S_2} \mathbf{1}_{N(v_1) \cap S_2 \neq \emptyset} \mathbf{1}_{N(v_2) \cap S_2 \neq \emptyset}}{|S_1|^2 \cdot \alpha_{v_1} \alpha_{v_2} |N(v_1) \cap S_2| |N(v_2) \cap S_2|} \right] \simeq \frac{pq^2}{\alpha_v (pn)^2} \mathbf{E} \left[ \frac{1}{|N(v) \cap S_2|^2} \right].$$

By Lemma A.1, with very high probability

$$|N(v) \cap S_2| \in [q|N(v)| - \sqrt{q|N(v)| \log n}, q|N(v)| + \sqrt{q|N(v)| \log n}],$$

and by our constraint that  $q = \Omega(\log n / d_{\min}) = \Omega(\log n / |N(v)|)$ , we have that with high probability

$$\mathbf{E}_{S_2} \left[ \frac{1}{|S_2 \cap N(v)|^2} \right] \simeq \frac{1}{(q|N(v)| \pm \sqrt{q|N(v)| \log n})^2} \lesssim O\left(\frac{1}{q^2 |N(v)|^2}\right).$$

so that

$$\frac{pq^2}{\alpha_v (pn)^2} \mathbf{E} \left[ \frac{1}{|N(v) \cap S_2|^2} \right] \lesssim \frac{1}{pn^2 \alpha_v |N(v)|^2}$$

4.  $\mathcal{C}_4 = \{(v_1, u_1), (v_2, u_2) \in E \mid v_1 = v_2, u_1 = u_2\}$ . Similarly to the previous case,

$$\mathbf{E}_{S_1, S_2} \left[ \frac{\mathbf{1}_{v_1, v_2 \in S_1} \cdot \mathbf{1}_{u_1, u_2 \in S_2} \mathbf{1}_{N(v_1) \cap S_2 \neq \emptyset} \mathbf{1}_{N(v_2) \cap S_2 \neq \emptyset}}{|S_1|^2 \cdot \alpha_{v_1} \alpha_{v_2} |N(v_1) \cap S_2| |N(v_2) \cap S_2|} \right] = \frac{pq}{\alpha_v (pn)^2} \mathbf{E} \left[ \frac{1}{|N(v) \cap S_2|^2} \right] \lesssim \frac{1}{n^2 \alpha_v pq |N(v)|^2}.$$

Combining the above and subtracting the expectation squared yields,

$$\begin{aligned} \text{Var}_{S_1, S_2} \left[ \frac{1}{|S_1|} \sum_{v \in S_1} \chi_v \right] &\lesssim \frac{1}{n^2} \sum_{(v_1, u_1), (v_2, u_2) \in \mathcal{C}_2} \frac{\tilde{A}_{v_1, u_1} \tilde{A}_{v_2, u_1} \tilde{x}_{u_1}^2}{q|N(v_1)||N(v_2)|} \\ &+ \frac{1}{n^2} \sum_{(v_1, u_1), (v_2, u_2) \in \mathcal{C}_3} \frac{\tilde{A}_{v_1, u_1} \tilde{x}_{u_1} \tilde{A}_{v_1, u_2} \tilde{x}_{u_2}}{p\alpha_v |N(v)|^2} + \frac{1}{n^2} \sum_{(v_1, u_1), (v_2, u_2) \in \mathcal{C}_4} \frac{\tilde{A}_{v, u}^2 \tilde{x}_{u_1}^2}{pq\alpha_v |N(v)|^2} - \left( \frac{1}{n} \sum_{(v, u) \in E} \frac{\tilde{A}_{v, u} \tilde{x}_u}{|N(v)|} \right)^2 \end{aligned}$$

After rearranging we get

$$\begin{aligned} &\frac{1}{n^2} \left( \sum_{(v_1, u_1), (v_2, u_2) \in \mathcal{C}_2} \left( \frac{1}{q|N(v_1)||N(v_2)|} - \frac{1}{|N(v_1)||N(v_2)|} \right) \tilde{A}_{v_1, u_1} \tilde{A}_{v_2, u_1} \tilde{x}_{u_1}^2 \right. \\ &\quad \left. + \sum_{(v_1, u_1), (v_2, u_2) \in \mathcal{C}_3} \left( \frac{1}{p\alpha_v |N(v)|^2} - \frac{1}{|N(v)|^2} \right) \tilde{A}_{v_1, u_1} \tilde{x}_{u_1} \tilde{A}_{v_1, u_2} \tilde{x}_{u_2} + \sum_{(v, u) \in E} \left( \frac{1}{pq\alpha_v |N(v)|^2} - \frac{1}{|N(v)|^2} \right) \tilde{A}_{v, u}^2 \tilde{x}_u^2 \right). \end{aligned}$$

If we let  $p = m_1/n$  and  $q = m_2/n$  so that  $\mathbf{E}_{S_1}[|S_1|] = m_1$  and  $\mathbf{E}_{S_2}[|S_2|] = m_2$ , we get that

$$\begin{aligned} \text{Var}_{S_1, S_2} \left[ \frac{1}{|S_1|} \sum_{v \in S_1} \chi_v \right] &\lesssim \frac{1}{n^2} \left( \sum_{(v_1, u_1), (v_2, u_2) \in \mathcal{C}_2} \frac{\tilde{A}_{v_1, u_1} \tilde{A}_{v_2, u_1} \tilde{x}_{u_1}^2}{q|N(v_1)||N(v_2)|} + \sum_{(v_1, u_1), (v_2, u_2) \in \mathcal{C}_3} \frac{\tilde{A}_{v_1, u_1} \tilde{x}_{u_1} \tilde{A}_{v_1, u_2} \tilde{x}_{u_2}}{p\alpha_v |N(v)|^2} + \sum_{(v, u) \in E} \frac{\tilde{A}_{v, u}^2 \tilde{x}_u^2}{pq\alpha_v |N(v)|^2} \right) \\ &\lesssim \sum_{(v_1, u_1), (v_2, u_2) \in \mathcal{C}_2} \left( \frac{1}{nm_2} \right) \frac{\tilde{A}_{v_1, u_1} \tilde{A}_{v_2, u_1} \tilde{x}_{u_1}^2}{|N(v_1)||N(v_2)|} + \sum_{(v_1, u_1), (v_2, u_2) \in \mathcal{C}_3} \left( \frac{1}{m_1 \cdot n} \right) \frac{\tilde{A}_{v_1, u_1} \tilde{x}_{u_1} \tilde{A}_{v_1, u_2} \tilde{x}_{u_2}}{\alpha_v |N(v)|^2} \\ &\quad + \sum_{(v, u) \in E} \left( \frac{1}{m_1 \cdot m_2} \right) \frac{\tilde{A}_{v, u}^2 \tilde{x}_u^2}{\alpha_v |N(v)|^2}. \end{aligned}$$

Note that the variance decreases as  $m_1, m_2$  increase. Therefore, if we assume for simplicity that  $m_1 = m_2 = m$  the variance is bounded by

$$\begin{aligned} \text{Var}_{S_1, S_2}[\xi] &\lesssim \frac{1}{nm} \left( \sum_{(v_1, u_1), (v_2, u_2) \in \mathcal{C}_2} \frac{\tilde{A}_{v_1, u_1} \tilde{A}_{v_2, u_1} \tilde{x}_{u_1}^2}{|N(v_1)||N(v_2)|} + \sum_{(v_1, u_1), (v_2, u_2) \in \mathcal{C}_3} \frac{\tilde{A}_{v_1, u_1} \tilde{x}_{u_1} \tilde{A}_{v_1, u_2} \tilde{x}_{u_2}}{\alpha_v |N(v)|^2} \right) \\ &\quad + \sum_{(v, u) \in E} \left( \frac{1}{m^2} \right) \frac{\tilde{A}_{v, u}^2 \tilde{x}_u^2}{\alpha_v |N(v)|^2}. \end{aligned} \tag{10}$$

Let's consider the pseudo precision of our estimator. Note that the cost generating the estimator  $\xi$  is approximately  $2m \cdot \bar{d}$ , where  $\bar{d}$  is the average degree of the graph. This is since we have roughly  $2m$  vertices to generate and for each vertex sampled we need to aggregate its neighbors information (which is approximately  $\bar{d}$ ).

$$\begin{aligned} \rho(\xi) = (\text{Var}(\xi) \cdot \text{Cost}(\xi))^{-1} &\gtrsim \left( \frac{2\bar{d}}{n} \left( \sum_{(v_1, u_1), (v_2, u_2) \in \mathcal{C}_2} \frac{\tilde{A}_{v_1, u_1} \tilde{A}_{v_2, u_1} \tilde{x}_{u_1}^2}{|N(v_1)||N(v_2)|} + \sum_{(v_1, u_1), (v_2, u_2) \in \mathcal{C}_3} \frac{\tilde{A}_{v_1, u_1} \tilde{x}_{u_1} \tilde{A}_{v_1, u_2} \tilde{x}_{u_2}}{\alpha_v |N(v)|^2} \right) \right. \\ &\quad \left. + \sum_{(v, u) \in E} \left( \frac{2\bar{d}}{m} \right) \frac{\tilde{A}_{v, u}^2 \tilde{x}_u^2}{\alpha_v |N(v)|^2} \right)^{-1}. \end{aligned} \tag{11}$$

Let

$$\phi = \frac{2\bar{d}}{n} \left( \sum_{(v_1, u_1), (v_2, u_2) \in \mathcal{C}_2} \frac{\tilde{A}_{v_1, u_1} \tilde{A}_{v_2, u_1} \tilde{x}_{u_1}^2}{|N(v_1)| |N(v_2)|} + \sum_{(v_1, u_1), (v_2, u_2) \in \mathcal{C}_3} \frac{\tilde{A}_{v_1, u_1} \tilde{x}_{u_1} \tilde{A}_{v_1, u_2} \tilde{x}_{u_2}}{\alpha_v |N(v)|^2} \right),$$

and note that as  $m$  increase, the efficiency converges to  $\phi$ .

If we define  $\delta$  as

$$\delta(m) = \frac{2\bar{d} \sum_{(v, u) \in E} \frac{\tilde{A}_{v, u}^2 \tilde{x}_u^2}{\alpha_v |N(v)|^2}}{m\phi}, \quad (12)$$

we get that  $\rho(\xi) \geq \frac{1}{\phi(1+\delta)}$ , as claimed. ■

Now we show that if we assume that the graph is  $d$ -regular, we can get a clean relation between the efficiency of our estimator and the size of the batch.

**Proof of Corollary 4.2:** Fix any  $\delta > 0$ . By Equation (12),

$$m = \frac{2\bar{d} \sum_{(v, u) \in E} \frac{\tilde{A}_{v, u}^2 \tilde{x}_u^2}{\alpha_v |N(v)|^2}}{\delta\phi}$$

so that the pseudo precision is at least

$$\rho(\xi) \geq (\phi(1 + \delta(m)))^{-1}.$$

By assuming that the graph is  $d$ -regular, and using the fact that for all  $v \in V$ ,  $1 - e^{-qd} \leq \alpha_v \leq qd$  and  $qd > 1$ ,

$$m = O \left( \frac{1}{\delta} \cdot \frac{n \cdot \left( \frac{1}{1-e^{-qd}} \frac{nd}{d^2} \right)}{\frac{1}{d^2} n \cdot \binom{d}{2} + \frac{1}{dq} \frac{1}{d^2} n \binom{d}{2}} \right) = O \left( \frac{1}{\delta} \cdot \frac{n/d \cdot \frac{1}{1-e^{-qd}}}{\frac{1}{2} + \frac{1}{2dq}} \right) = O \left( \frac{n}{\delta d} \right).$$
■

**Remark on graph-wise sampling:** Note that the case where  $S_1 = S_2$  is equivalent to subgraph sampling. The same analysis can be adapted to subgraph sampling, and yields the same proposed minibatch size.
